# Supplementary material for: The impact of grid cell size and fluid modeling on CO 2 plume distribution numerical simulation
Source: Research Square preprint supplement (doi:10.21203/rs.3.rs-7991282/v1), 2026-01-29
Supplement: Supplementary file 1 [file d9cd60035d6d06dd2d9e5d5c.docx]

**Supplementary Document**


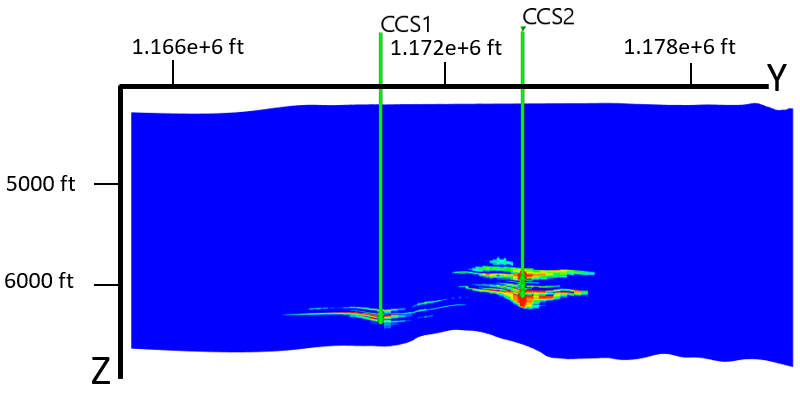
This document provides the close-up images version of plume images of Figure 12 from the main manuscript.

(a)


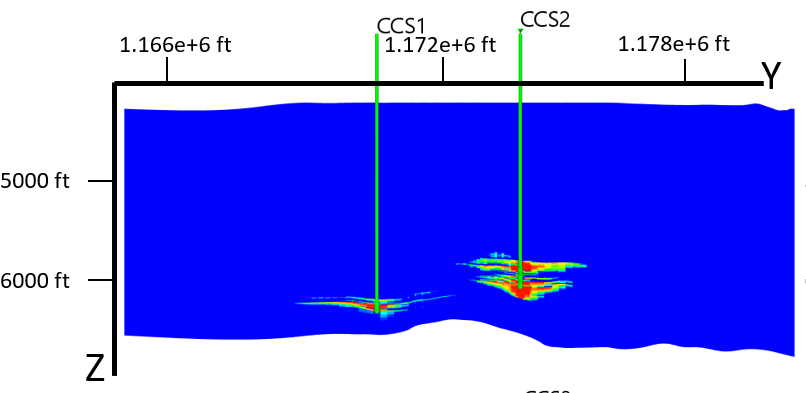
(b)


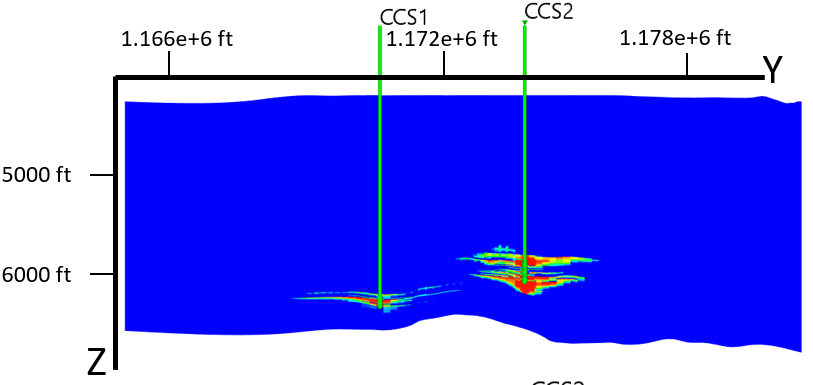
(c)


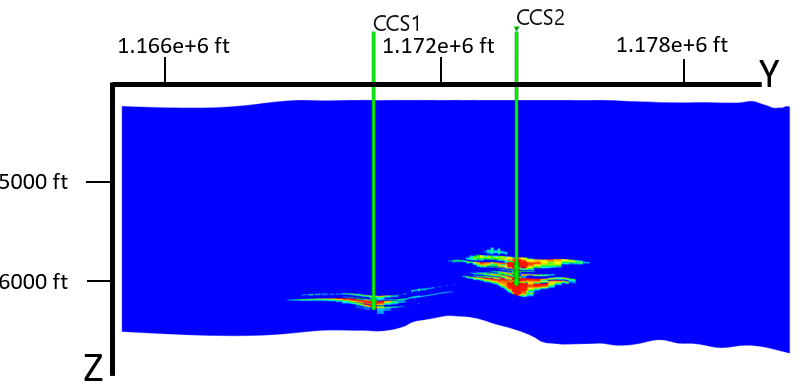
(d)


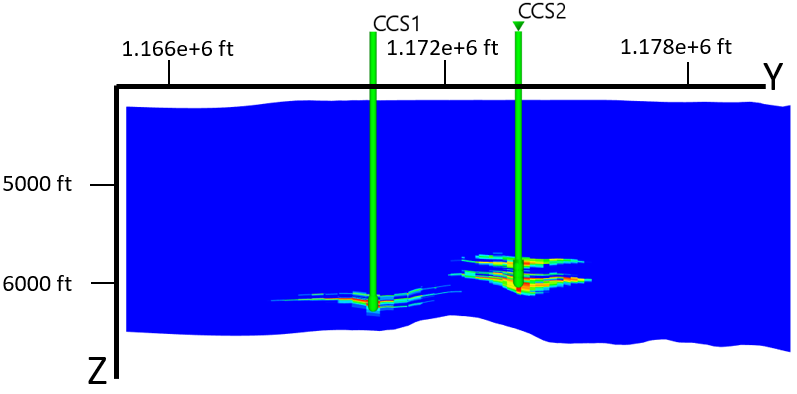
(e)


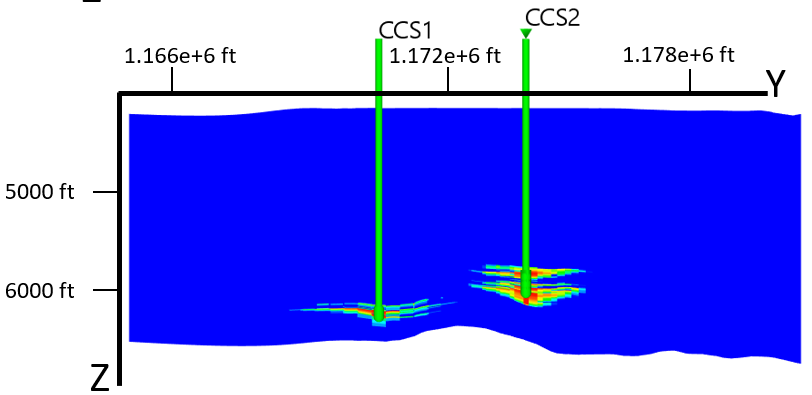
(f)


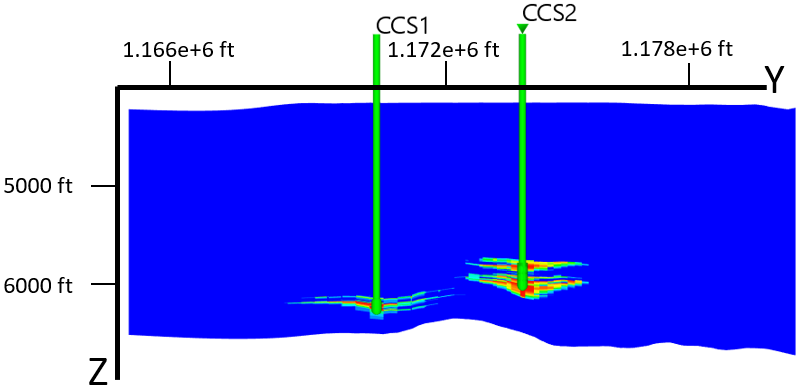
(g)


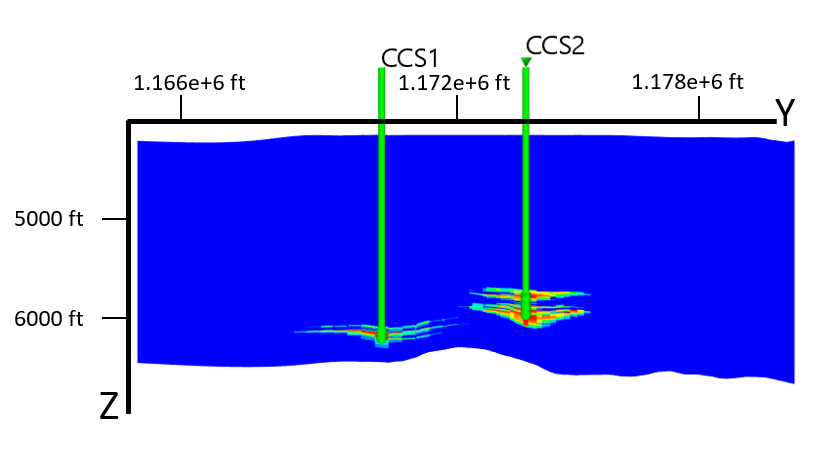
(h)


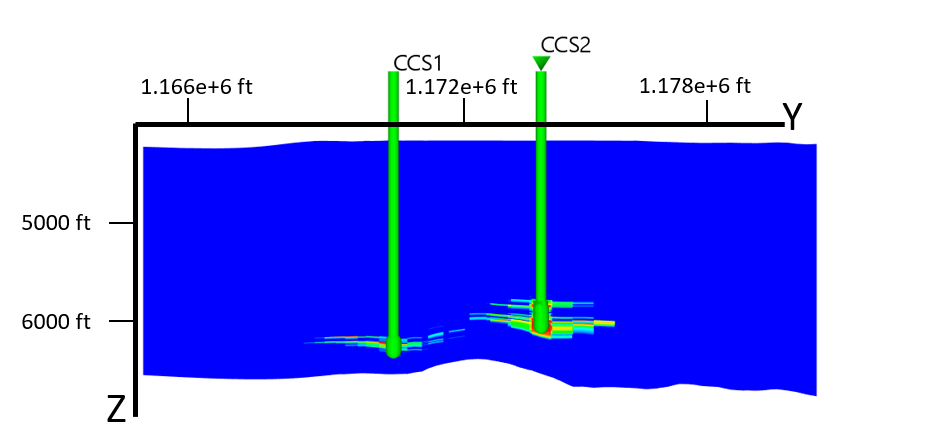
(i)


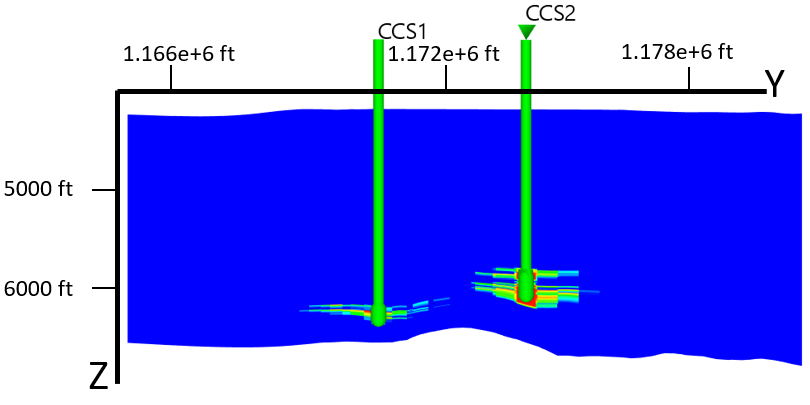
(j)


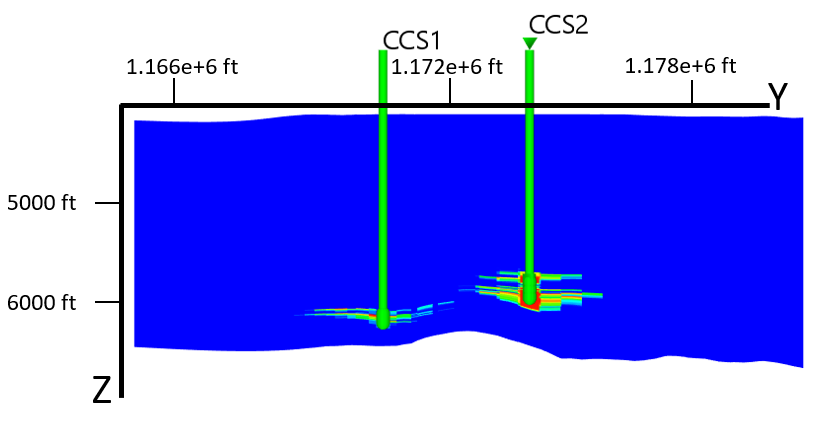
(k)


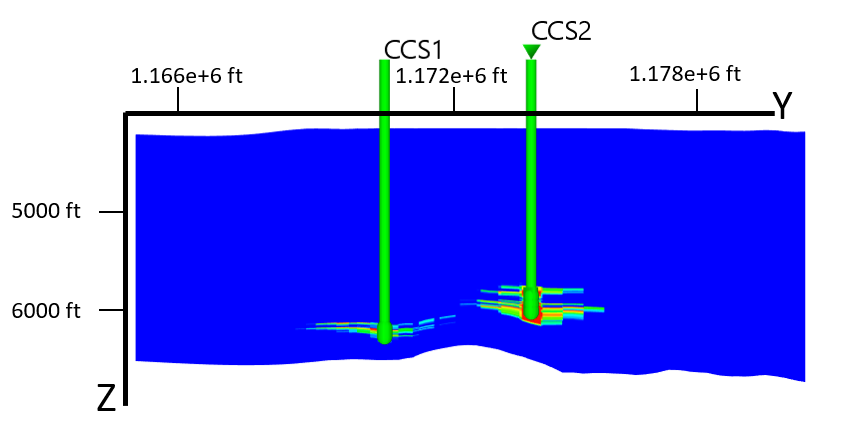
(l)

Figure 1. Gas Saturations in Cases 2(a)-(d), 3(e)-(h), and 4(i)-(l)
